# Supplementary material for: Handbuch des Betäubungsmittelstrafrechts. (Böllinger)
Source: PLOS journal article supplement (doi:10.1371/journal.ppat.0020046), 2000-01-01
Supplement: S2 (10.1371/journal.ppat.0020046.s002) [file journal.ppat.0020046.s002]

**Table S2.** Oligonucleotides used in this study.

________________________________________________________________________

Relevant characteristics or sequence *a* Comments

________________________________________________________________________

**Oligonucleotides**

oCR1 AAAAACGCGGATCCATGGTGATAAACATGGTTGACG 5’ *sidC*; *Bam*HI

oCR2 AAAAACGCGTCGACCTATTTCTTTATAATTCCCGTGTAC 3’ *sidC*; *Sal*I

oCR4 AAAAACGCGTCGACTTAAATAGTAAGACTCGAGTTAG 3’ *sidD*; *Sal*I

oCR7 AAAAACGCGTCGACTCATGCTACTATTAAGCATAGAGG 5’ *sdhB*; *Sal*I

oCR8 AAAAGAATGCGGCCGCTTACAATTTGGTAAATTCGATTTCAC 3’ *sdhB*; *Not*I

oCR13 AAAAACGCGGATCCATGCGTTCGATTATTACACAAATC 5’ *sidD*, *Bam*HI

oCR29 AAAAACGCGTCGACTCATGAACATGGTTGACAAAATAAAATTC 5’ *sdcA*; *Sal*I

oCR30 AAAAGAATGCGGCCGCCTATATTGTATTCCTAACAGTTTCTC 3’ *sdcA*; *Not*I

oCR-P1 TATGGCCATGGATCGGAGTAGGGATCGCCTACCTCCTTTTGA-

GACAGAGACGCGTATCCTCGGTGGTGGTGGTGGTG ‘*Nde*I, *Bam*HI’

oCR-P2 GATCCACCACCACCACCACCGAGGATACGCGTCTCTGTCTCA-

AAAGGAGGTAGGCGATCCCTACTCCGATCCATGGCCA ‘*Bam*HI, *Nde*I’

________________________________________________________________________

*a* Restriction sites are underlined.
